# Supplementary material
Source: Springer Nature journal article supplement (https://www.springermedizin.de/resource/supplementary/12906_2011_460_MOESM4_ESM.pdf/9519538)

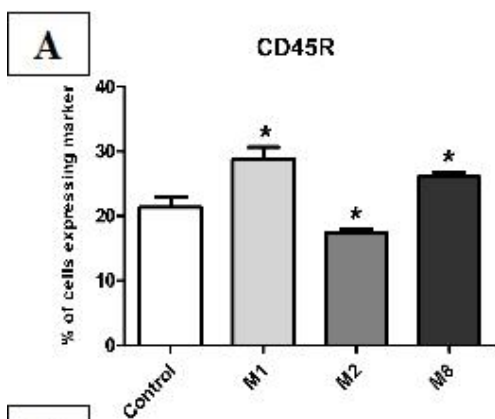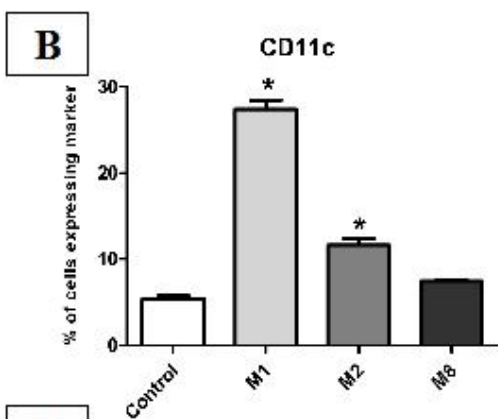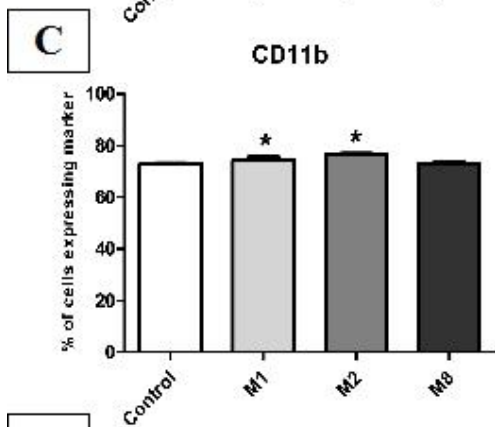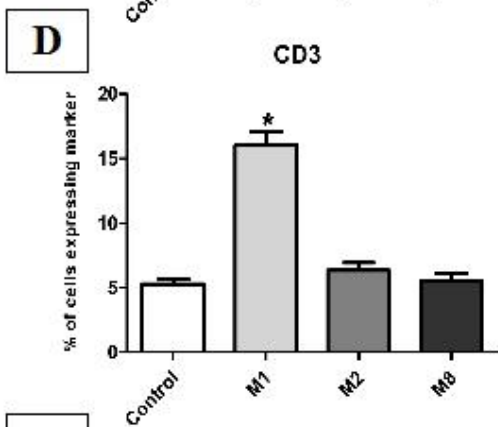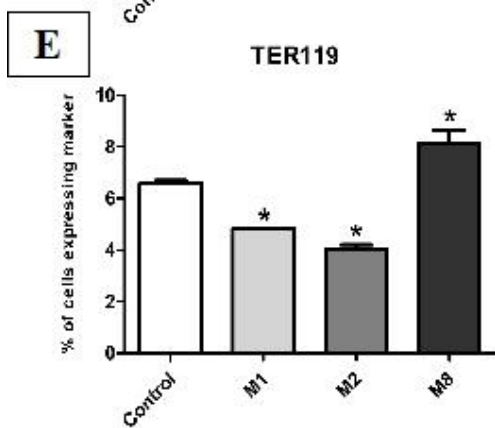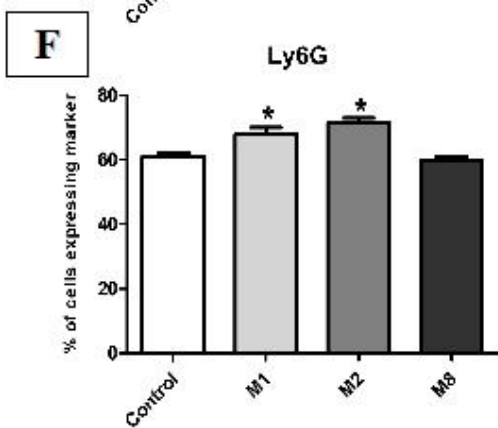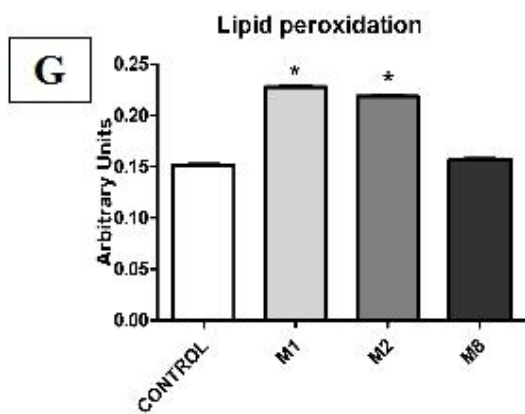

Supplement: MOESM4 [file 9519538]
